# Supplementary material for: Interaction between Neighborhood Exposome and Genetic Risk in Child Psychotic-like Experiences
Source: Research Square preprint supplement (doi:10.21203/rs.3.rs-5830171/v1), 2025-02-18
Supplement: Supplementary file 1 [file c085e13b17e6e320eee158ce.pdf]

## Supplemental material

### Table of Contents

|                                                                                                                                                                                                                                             |    |
|---------------------------------------------------------------------------------------------------------------------------------------------------------------------------------------------------------------------------------------------|----|
| Table 1. Characteristics of training samples vs. analytic samples .....                                                                                                                                                                     | 2  |
| Table 2. Comparison between the analytic sample and excluded participants in the ABCD cohort .....                                                                                                                                          | 3  |
| Table 3. The association between polygenic risk score (calculated by SBayesRC), neighborhood exposome score, and persistent distressing psychotic-like experiences, additionally adjusting for self-reported race and ethnicity group ..... | 5  |
| Table 4. The association between polygenic risk score (calculated by SBayesRC), neighborhood exposome score, and persistent distressing psychotic-like experiences, excluding the African ancestry population.....                          | 6  |
| Table 5. Training weights of each ancestral schizophrenia polygenic risk score .....                                                                                                                                                        | 7  |
| Table 6 List of neighborhood exposure definitions and years measured .....                                                                                                                                                                  | 8  |
| Figure 1. Schizophrenia polygenic risk score (calculated by SBayesRC) in the test set .....                                                                                                                                                 | 10 |
| Figure 2. Additive interaction between schizophrenia polygenic risk score (calculated by SBayesRC) and neighborhood exposome score on persistent distressing psychotic-like experiences .....                                               | 11 |
| Figure 3. Schizophrenia polygenic risk score (calculated by PRScsx) in the test set .....                                                                                                                                                   | 12 |
| Figure 4. Schizophrenia polygenic risk score (calculated by PRScsx), neighborhood exposome score, and persistent distressing psychotic-like experiences.....                                                                                | 13 |
| Figure 5. Principal component analysis on population stratification.....                                                                                                                                                                    | 14 |

**Table 1. Characteristics of training samples vs. analytic samples**

| <b>Characteristic</b>                                 | <b>Training (N = 1,604)<br/>n (%)</b> | <b>Analytic (N = 6,449)<br/>n (%)</b> |
|-------------------------------------------------------|---------------------------------------|---------------------------------------|
| Age, mean (SD)                                        | 9.9 (0.6)                             | 9.9 (0.6)                             |
| Sex                                                   |                                       |                                       |
| Female                                                | 759 (47.3)                            | 3,069 (47.6)                          |
| Income-to-needs ratio, mean (SD)                      | 4.3 (3.3)                             | 4.3 (3.3)                             |
| Family history of psychosis                           |                                       |                                       |
| Yes                                                   | 142 (8.9)                             | 517 (8.0)                             |
| Parental education                                    |                                       |                                       |
| At least one parent have obtained a bachelor's degree | 1,065 (66.4)                          | 4,264 (66.1)                          |
| Race and ethnicity                                    |                                       |                                       |
| Non-Hispanic White                                    | 938 (58.5)                            | 3,718 (57.7)                          |
| Non-Hispanic Black                                    | 173 (10.8)                            | 730 (11.3)                            |
| Hispanic                                              | 290 (18.1)                            | 1,174 (18.2)                          |
| Non-Hispanic Asian                                    | 35 (2.2)                              | 133 (2.1)                             |
| Other                                                 | 168 (10.5)                            | 694 (10.8)                            |
| Genetic ancestry                                      |                                       |                                       |
| EUR                                                   | 1,246 (77.7)                          | 4,985 (77.3)                          |
| AFR                                                   | 174 (10.8)                            | 706 (10.9)                            |
| EAS                                                   | 37 (2.3)                              | 168 (2.6)                             |
| ADMIX                                                 | 147 (9.2)                             | 590 (9.1)                             |
| Persistent distressing psychotic-like experiences     |                                       |                                       |
| Yes                                                   | 316 (19.7)                            | 1,272 (19.7)                          |

**Table 2. Comparison between the analytic sample and excluded participants in the ABCD cohort**

|                                                       | Total: 11868                        |                                     |              |
|-------------------------------------------------------|-------------------------------------|-------------------------------------|--------------|
|                                                       | Analytic<br>(N = 6,449)             | Excluded<br>(N = 5,419)             | %<br>Missing |
| <b>A. Sample Characteristics</b>                      |                                     |                                     |              |
| Age (mean (SD))                                       | 9.92 (0.63)                         | 9.91 (0.62)                         | 0            |
| Sex (%) <sup>a</sup>                                  |                                     |                                     | 0            |
| Female                                                | 3380 (52.4)                         | 2808 (51.8)                         |              |
| Male                                                  | 3069 (47.6)                         | 2608 (48.1)                         |              |
| Race/Ethnicity (%)                                    |                                     |                                     | 0            |
| Non-Hispanic White                                    | 3718 (57.7)                         | 2455 (45.3)                         |              |
| Non-Hispanic Black                                    | 730 (11.3)                          | 1054 (19.5)                         |              |
| Non-Hispanic Asian                                    | 133 (2.1)                           | 119 (2.2)                           |              |
| Non-Hispanic Others <sup>b</sup>                      | 694 (10.8)                          | 553 (10.2)                          |              |
| Hispanic Ethnicity                                    | 1174 (18.2)                         | 1236 (22.8)                         |              |
| Parent Bachelor's Degree (%)                          | 4264 (66.1)                         | 2791 (51.6)                         | 0.1          |
| INR (mean (SD))                                       | 4.33 (3.31)                         | 3.89 (3.33)                         | 10           |
| Family History of Psychosis (%)                       | 517 (8.0)                           | 470 (8.7)                           | 0            |
| <b>B. Area-level Deprivation Index (Median [IQR])</b> |                                     |                                     |              |
| % Single Parent Households                            | 13.59 [8.65, 21.50]                 | 13.24 [8.48, 21.03]                 | 31.4         |
| % Home Ownership                                      | 71.63 [54.30, 83.94]                | 72.64 [55.59, 83.94]                | 31.4         |
| % Less Than 9 Years Education                         | 2.19 [0.92, 5.09]                   | 2.23 [0.93, 4.95]                   | 31.4         |
| % High School Education                               | 92.91 [86.31, 96.40]                | 92.79 [86.07, 96.27]                | 31.4         |
| % White Collar Occupation                             | 94.51 [91.64, 96.65]                | 94.49 [91.74, 96.60]                | 31.4         |
| Median Family Income                                  | 75,000.00 [54,368.00, 98,690.00]    | 75,768.50 [54,565.25, 98,546.00]    | 31.4         |
| Income Disparity                                      | 1.97 [1.23, 2.79]                   | 1.93 [1.24, 2.79]                   | 31.4         |
| Median Property Value                                 | 227,200.00 [154,600.00, 318,800.00] | 227,100.00 [151,450.00, 329,000.00] | 31.4         |
| Median Gross Rent                                     | 1,057.00 [858.00, 1,326.00]         | 1,052.00 [849.75, 1,343.00]         | 31.4         |
| Median Monthly Mortgage                               | 1,403.00 [1,081.00, 1,719.00]       | 1,401.00 [1,096.00, 1,727.25]       | 31.4         |
| Crowding                                              | 1.55 [0.48, 3.56]                   | 1.43 [0.48, 3.31]                   | 31.4         |
| Unemployment                                          | 7.20 [4.88, 10.49]                  | 7.25 [4.90, 10.34]                  | 31.4         |
| % Below Poverty Line                                  | 6.56 [3.07, 13.47]                  | 6.30 [3.04, 12.95]                  | 31.4         |
| % Below 138% Poverty Line                             | 15.03 [8.97, 26.68]                 | 14.95 [8.53, 26.53]                 | 31.4         |
| % Households with No Car                              | 4.68 [2.13, 9.61]                   | 4.39 [1.99, 9.66]                   | 31.4         |
| % Poor Plumbing                                       | 0.00 [0.00, 0.30]                   | 0.00 [0.00, 0.15]                   | 31.4         |
| <b>C. Child Opportunity Index (Median [IQR])</b>      |                                     |                                     |              |
| Industrial Pollutants                                 | -0.40 [-0.71, 0.45]                 | -0.40 [-0.73, 0.42]                 | 31.4         |
| Hazardous Waste Dump Sites                            | 0.27 [0.27, 0.27]                   | 0.27 [0.27, 0.27]                   | 31.4         |
| Access to Food                                        | 0.38 [-0.17, 0.66]                  | 0.39 [-0.16, 0.69]                  | 31.4         |
| Access to Green Space                                 | -0.30 [-0.91, 0.56]                 | -0.30 [-0.88, 0.54]                 | 31.4         |

|                                                       |                                 |                                 |      |
|-------------------------------------------------------|---------------------------------|---------------------------------|------|
| Walkability                                           | 10.50 [7.17, 14.00]             | 10.42 [7.33, 14.00]             | 31.4 |
| <b>D. Crime (Median [IQR])</b>                        |                                 |                                 |      |
| Total Crime                                           | 22,761.33 [7,832.00, 53,399.67] | 22,761.33 [7,832.00, 53,399.67] | 31.4 |
| <b>E. Environmental Quality (Median [IQR])</b>        |                                 |                                 |      |
| PM2.5 (µg/m3)                                         | 7.67 [6.54, 8.60]               | 7.76 [6.65, 8.57]               | 31.4 |
| NO2 (ppb)                                             | 18.71 [14.76, 22.13]            | 18.93 [14.66, 22.40]            | 31.4 |
| O3 (ppb)                                              | 40.47 [38.17, 45.20]            | 40.26 [38.16, 44.99]            | 31.4 |
| Lead Risk                                             | 15.71 [6.90, 31.25]             | 15.93 [6.62, 31.49]             | 31.4 |
| Proximity to Roadways                                 | 857.18 [396.70, 1,575.70]       | 848.52 [375.48, 1,572.78]       | 31.4 |
| <b>F. Social Vulnerability Index(Median [IQR])</b>    |                                 |                                 |      |
| % Minority Population                                 | 46.60 [28.45, 70.55]            | 46.02 [28.63, 69.66]            | 31.4 |
| % Non-English Speakers                                | 48.57 [27.67, 71.35]            | 50.14 [27.67, 71.35]            | 31.4 |
| <b>G. Polygenic Risk Scores (mean (SD))</b>           |                                 |                                 |      |
| PRS-csx                                               | -0.04 (1.00)                    | 0.17 (0.98)                     | 34.1 |
| PRS-SBayesRC                                          | -0.03 (1.00)                    | 0.13 (0.97)                     | 34.1 |
| <b>H. Outcome</b>                                     |                                 |                                 |      |
| Persistent distressing psychotic-like experiences (%) | 1272 (19.7)                     | 752 (21.7)                      | 16.5 |

<sup>a</sup> sex=3 (n=3,0.4%) is excluded.

<sup>b</sup> Others included participants who reported a race that was not included in the list, did not know their race, or did not disclose.

**Table 3. The association between polygenic risk score (calculated by SBayesRC), neighborhood exposome score, and persistent distressing psychotic-like experiences, additionally adjusting for self-reported race and ethnicity group**

| <b>Association alone</b>          |                                 |          |
|-----------------------------------|---------------------------------|----------|
|                                   | <b>OR (95% CI) <sup>a</sup></b> | <b>P</b> |
| SCZ-PRS                           | 1.06 (0.97, 1.16)               | 0.187    |
| NE score                          | 1.15 (1.04, 1.26)               | <0.001   |
| <b>Multiplicative interaction</b> |                                 |          |
|                                   | <b>OR (95% CI)</b>              | <b>P</b> |
| NE score*SCZ-PRS                  | 0.93 (0.86, 1.00)               | 0.066    |
| <b>Additive interaction</b>       |                                 |          |
|                                   | <b>RERI</b>                     | <b>P</b> |
| NE score*SCZ-PRS                  | -0.05 (-0.14, 0.03)             | 0.224    |

Abbreviation: NE, neighborhood exposome; SCZ-PRS, schizophrenia polygenic risk score

<sup>a</sup>Models were adjusted for age, sex, income-to-needs ratio (INR), family history of psychosis, parental education levels, and four genetic principal components (PCs).

**Table 4. The association between polygenic risk score (calculated by SBayesRC), neighborhood exposome score, and persistent distressing psychotic-like experiences, excluding the African ancestry population**

| <b>Association alone</b>          |                                 |          |
|-----------------------------------|---------------------------------|----------|
|                                   | <b>OR (95% CI) <sup>a</sup></b> | <b>P</b> |
| SCZ-PRS                           | 1.07 (0.99, 1.16)               | 0.100    |
| NE score                          | 1.16 (1.05, 1.28)               | 0.004    |
| <b>Multiplicative interaction</b> |                                 |          |
|                                   | <b>OR (95% CI)</b>              | <b>P</b> |
| NE score* SCZ-PRS                 | 0.95(0.88, 1.04)                | 0.255    |
| <b>Additive interaction</b>       |                                 |          |
|                                   | <b>RERI</b>                     | <b>P</b> |
| NE score*SCZ-PRS                  | -0.03 (-0.11, 0.06)             | 0.532    |

Abbreviation: NE, neighborhood exposome; SCZ-PRS, schizophrenia polygenic risk score

<sup>a</sup>Models were adjusted for age, sex, income-to-needs ratio (INR), family history of psychosis, parental education levels, and four genetic principal components (PCs).

**Table 5. Training weights of each ancestral schizophrenia polygenic risk score**

|     | <b>N<sub>summary statistics</sub></b> | <b>N<sub>cases</sub></b> | <b>N<sub>controls</sub></b> | <b>Weight (SBayesRC)<sup>a</sup></b> | <b>Weight (PRScsx)</b> |
|-----|---------------------------------------|--------------------------|-----------------------------|--------------------------------------|------------------------|
| EUR | 127,906                               | 52,017                   | 75,889                      | 0.29                                 | 0.35                   |
| AFR | 9,824                                 | 5,998                    | 3,826                       | 0.16                                 | 0.15                   |
| EAS | 27,363                                | 12,305                   | 15,058                      | -0.15                                | -0.16                  |

Abbreviation: AFR, African ancestry; EAS, East Asian ancestry; EUR, European ancestry

<sup>a</sup>Weights were calculated by regressing the phenotype on polygenic risk scores calculated from EUR, AFR, and EAS summary statistics before being used to derive a multi-ancestral polygenic risk score.

**Table 6 List of neighborhood exposure definitions and years measured**

| <b>Index<br/>Domain/Exposure<br/>Component</b> | <b>Definition</b>                                                                                                                                                                       | <b>Year(s)<br/>Measured</b> |
|------------------------------------------------|-----------------------------------------------------------------------------------------------------------------------------------------------------------------------------------------|-----------------------------|
| <b>Area-level Deprivation Index</b>            |                                                                                                                                                                                         |                             |
| % Single Parent Households                     | Percentage of single-parent households                                                                                                                                                  | 2010-2014                   |
| % Home Ownership                               | Percentage of owner-occupied households                                                                                                                                                 | 2010-2014                   |
| % Less Than 9 Years Education                  | Percentage of population aged $\geq 25$ years with $< 9$ years of education                                                                                                             | 2010-2014                   |
| % At least High School Education               | Percentage of population aged $\geq 25$ years with at least a high school diploma                                                                                                       | 2010-2014                   |
| % White Collar Occupation                      | Percentage of employed persons aged $\geq 16$ years in white-collar occupations                                                                                                         | 2010-2014                   |
| Median Family Income                           | Median family income                                                                                                                                                                    | 2010-2014                   |
| Income Disparity                               | Income disparity is defined by Singh (2003) as the log of 100 x ratio of the number of households with $< 10000$ annual income to the number of households with $> 50000$ annual income | 2010-2014                   |
| Median Home Value                              | Median home value                                                                                                                                                                       | 2010-2014                   |
| Median Gross Rent                              | Median gross rent                                                                                                                                                                       | 2010-2014                   |
| Median Monthly Mortgage                        | Median monthly mortgage                                                                                                                                                                 | 2010-2014                   |
| Crowding                                       | Percentage of occupied housing units with $> 1$ person per room (crowding)                                                                                                              | 2010-2014                   |
| Unemployment                                   | Percentage of civilian labor force population aged $\geq 16$ y unemployed (unemployment rate)                                                                                           | 2010-2014                   |
| % Below Poverty Line                           | Percentage of families below the poverty level                                                                                                                                          | 2010-2014                   |
| % Below 138% Poverty Line                      | Percentage of population below 138% of the poverty threshold                                                                                                                            | 2010-2014                   |
| % Households with No Car                       | Percentage of occupied housing units without a motor vehicle                                                                                                                            | 2010-2014                   |
| % Poor Plumbing                                | Percentage of occupied housing units without complete plumbing (log)                                                                                                                    | 2010-2014                   |
| <b>Child Opportunity Index 2.0</b>             |                                                                                                                                                                                         |                             |
| Industrial Pollutants                          | Index of toxic chemicals released by industrial facilities, converted to natural log units, transformed to z-scores and multiplied by -1                                                | 2015                        |
| Hazardous Waste Sites                          | Average number of Superfund sites within a 2-mile radius, converted to natural log units, transformed to z-scores and multiplied by -1                                                  | 2015                        |
| Access to Food                                 | Percentage households without a car located further than a half-mile from the nearest supermarket, transformed to z-scores and multiplied by -1                                         | 2015                        |
| Access to Green Space                          | Percentage impenetrable surface areas such as rooftops, roads or parking lots, transformed to z-scores and multiplied by -1                                                             | 2015                        |



|                                   |                                                                                                                                                                                                                                                                                  |                        |
|-----------------------------------|----------------------------------------------------------------------------------------------------------------------------------------------------------------------------------------------------------------------------------------------------------------------------------|------------------------|
| Walkability                       | National Walkability Index from the Smart Location Database created by the United States Environmental Protection Agency ( <a href="https://www.epa.gov/smartgrowth/smart-location-mapping#walkability">https://www.epa.gov/smartgrowth/smart-location-mapping#walkability</a> ) | 2010                   |
| <b>Crime</b>                      |                                                                                                                                                                                                                                                                                  |                        |
| Total Crime                       | County-level counts of arrests and offenses from Uniform Crime Reporting Program Data ( <a href="https://doi.org/10.3886/ICPSR33523.v2">https://doi.org/10.3886/ICPSR33523.v2</a> ).                                                                                             | average from 2010-2012 |
| <b>Environmental Quality</b>      |                                                                                                                                                                                                                                                                                  |                        |
| PM2.5 (µg/m3)                     | Spatio-temporal model predictions measured in µg/m3 at 1 km2 resolution                                                                                                                                                                                                          | 2016                   |
| NO2 (ppb)                         | Spatio-temporal model predictions measured in ppb (parts per billion) at 1 km2 resolution                                                                                                                                                                                        | 2016                   |
| O3 (ppb)                          | Spatio-temporal model predictions measured in ppb (parts per billion) at 1 km2 resolution                                                                                                                                                                                        | 2016                   |
| Lead Risk                         | Estimated percentage of homes at risk for lead exposure given lead-based paint in census tract of primary residential address                                                                                                                                                    | 2010-2014              |
| Proximity to Roadways             | Number of meters away from major road or highway                                                                                                                                                                                                                                 | 2016                   |
| <b>Social Vulnerability Index</b> |                                                                                                                                                                                                                                                                                  |                        |
| Percent Ethnoracial Minority      | Percentage of ethnoracial minority population (i.e., all but white, non-Hispanic)                                                                                                                                                                                                | 2014-2018              |
| Percent Non-English Speakers      | Percentage of persons at least 5 years old who speak English “less than well”                                                                                                                                                                                                    | 2014-2018              |

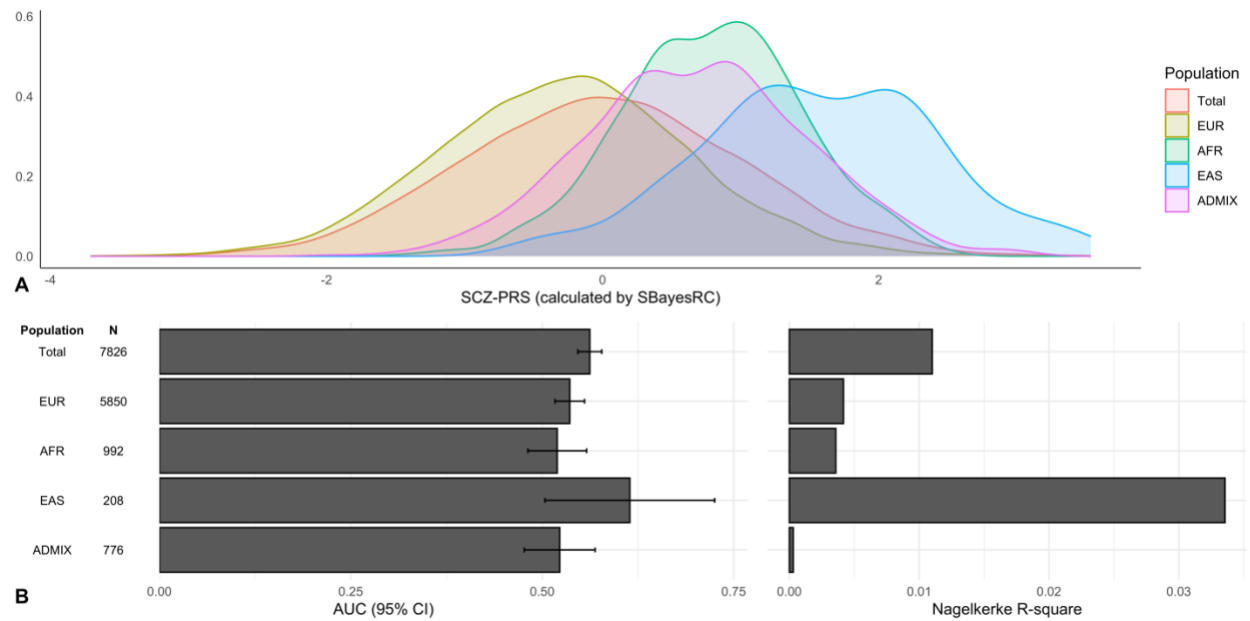

**Figure 1. Schizophrenia polygenic risk score (calculated by SBayesRC) in the test set**

(A) Distribution of polygenic risk score in total samples in the test set and across ancestry groups; (B) Performance of polygenic risk score in total samples and across ancestry group

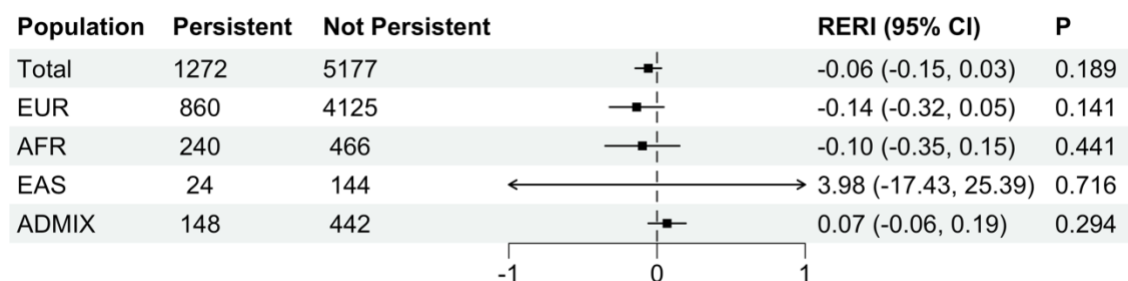

**Figure 2. Additive interaction between schizophrenia polygenic risk score (calculated by SBayesRC) and neighborhood exposome score on persistent distressing psychotic-like experiences**

Abbreviation: ADMIX, Admixed ancestry; AFR, African ancestry; EAS, East Asian ancestry; EUR, European ancestry; PLE, persistent distressing psychotic-like experience; RERI, relative excessive risk due to interaction

Note: Models were adjusted for age, sex, income-to-needs ratio (INR), family history of psychosis, parental education levels, and four genetic principal components (PCs).

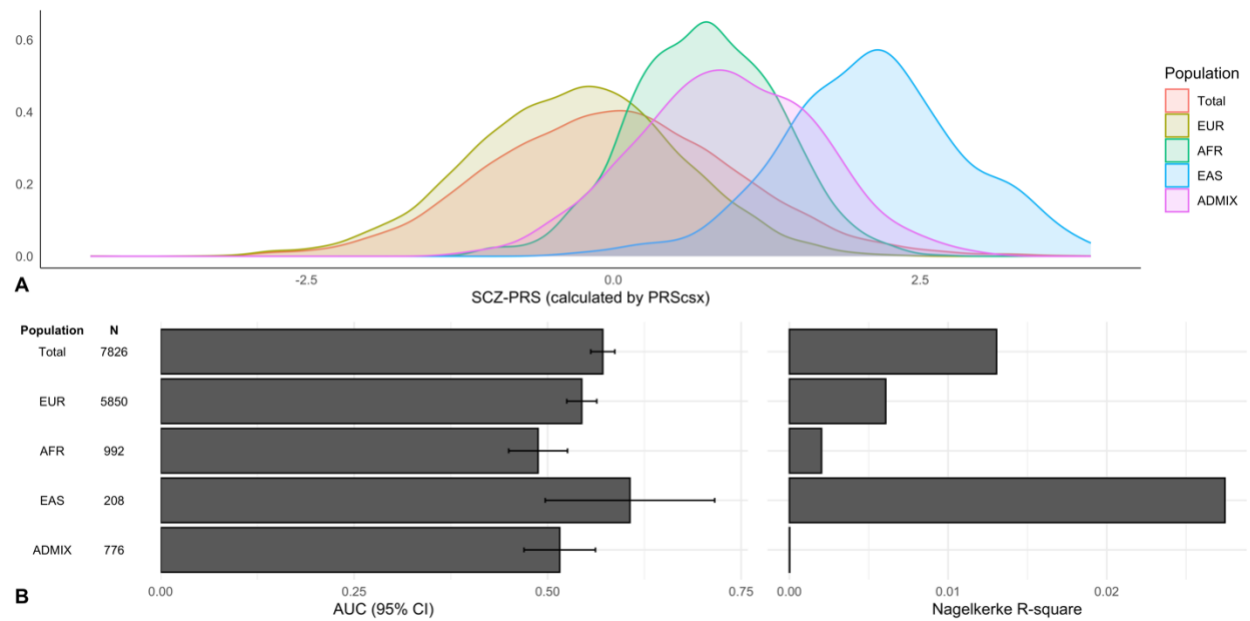

**Figure 3. Schizophrenia polygenic risk score (calculated by PRSsx) in the test set**

(A) Distribution of polygenic risk score in total samples in the test set and across ancestry groups; (B) Performance of polygenic risk score in total samples and across ancestry groups

A

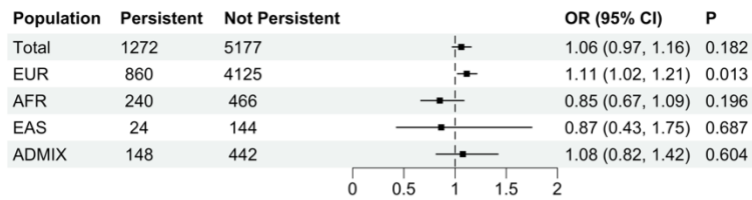

B

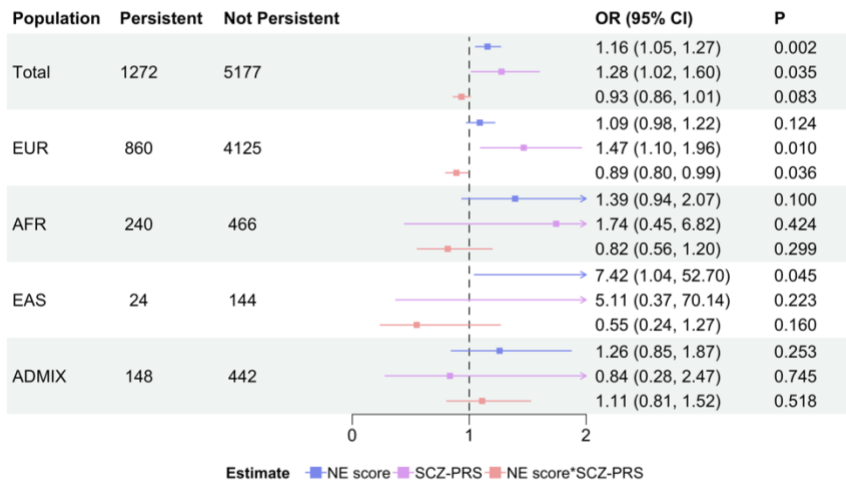

C

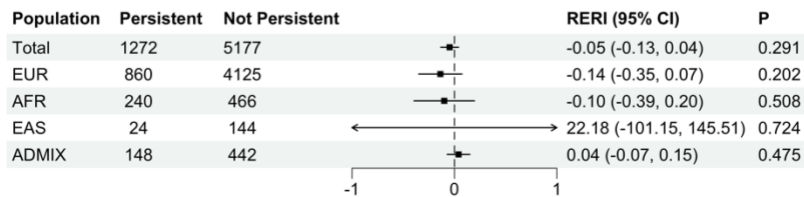

**Figure 4. Schizophrenia polygenic risk score (calculated by PRScsx), neighborhood exposome score, and persistent distressing psychotic-like experiences**

Abbreviation: ADMIX, Admixed ancestry; AFR, African ancestry; EAS, East Asian ancestry; EUR, European ancestry; PLE, persistent distressing psychotic-like experience; RERI, related excessive risk due to interaction; SCZ-PRS, schizophrenia polygenic risk score

(A) The association between polygenic risk score and persistent distressing psychotic-like experiences; (B) Multiplicative interaction between polygenic risk score and neighborhood exposome score. The interpretation for each term would be (1) OR of persistent distressing PLE for a one-decile increase in NE among those with a population mean SCZ-PRS (NE score); OR of persistent distressing PLE for a one-SD increase in SCZ-PRS among those in the first decile of NE score (SCZ-PRS); interaction between NE score and SCZ-PRS (NE score\*SCZ-PRS); (C) Additive interaction between polygenic risk score and neighborhood exposome score.

Note: Models were adjusted for age, sex, income-to-needs ratio (INR), family history of psychosis, parental education levels, and four genetic principal components (PCs)

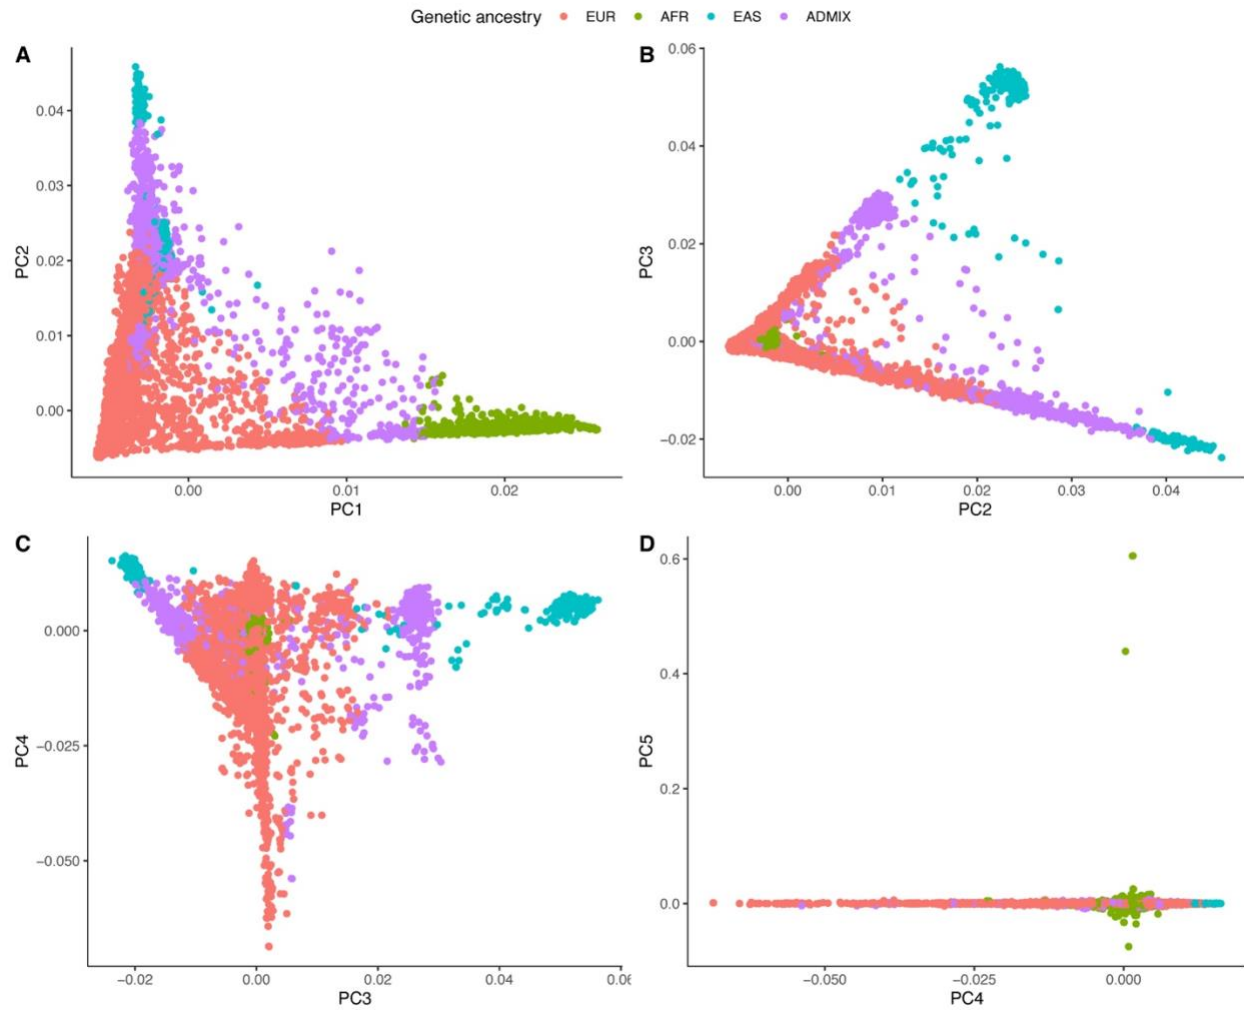

**Figure 5. Principal component analysis on population stratification**
